# Supplementary material for: Si containing block copolymers quickly assemble into sub-6 nm domains
Source: Royal Society of Chemistry journal article supplement (doi:10.1039/d1py01526e), 2022-01-01
Supplement: d1py01526e1.pdf [file d1py01526e1.pdf]

## Supporting Information

### Si Containing Block Copolymers Quickly Assembly into Sub-6 nm Domains

Jianuo Zhou, Xuemiao Li, Zhenyu Yang and Hai Deng\*

School of Microelectronics and State Key Laboratory of Molecular Engineering of Polymers, Fudan University, Shanghai 200433, China

#### 1. Synthetic route and characterization of TMSS and StNPOSS monomer.

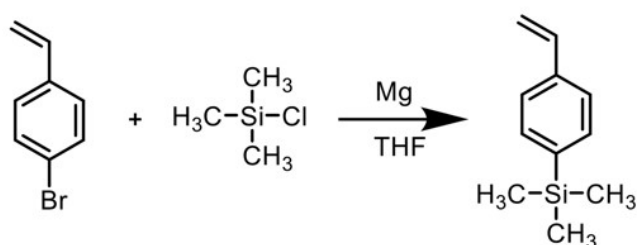

Scheme S1. Synthetic route of TMSS monomer.

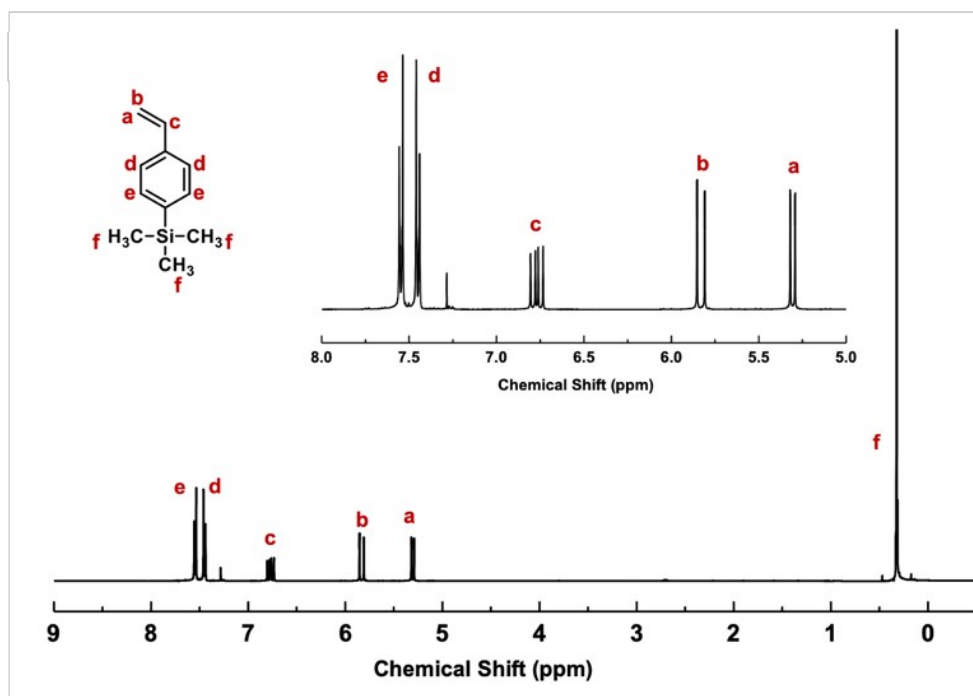

Figure S1. <sup>1</sup>H NMR spectrum of TMSS monomer. (400 MHz, CDCl<sub>3</sub>)

<sup>1</sup>H NMR (400 MHz, CDCl<sub>3</sub>) δ 7.55 (d, *J* = 6.4 Hz, Ar-*H*, 2H), 7.45 (d, *J* = 6.4 Hz, Ar-*H*, 2H), 6.76 (dd, *J* = 14.4, 9.2 Hz, -CH=CH<sub>2</sub>, 1H), 5.85 (d, *J* = 14.4 Hz, -CH=CH<sub>2</sub>, 1H), 5.30 (d, *J* = 9.2 Hz, -CH=CH<sub>2</sub>, 1H), 0.33 (s, -Si(CH<sub>3</sub>)<sub>3</sub>, 9H).

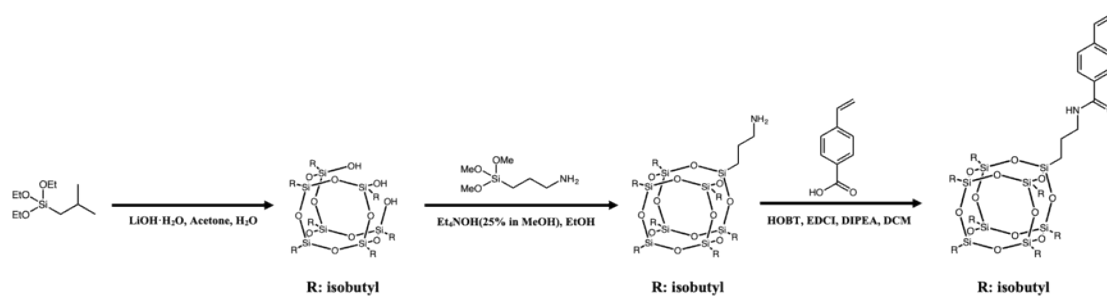

**Scheme S2.** Synthetic route of StNPOSS monomer.

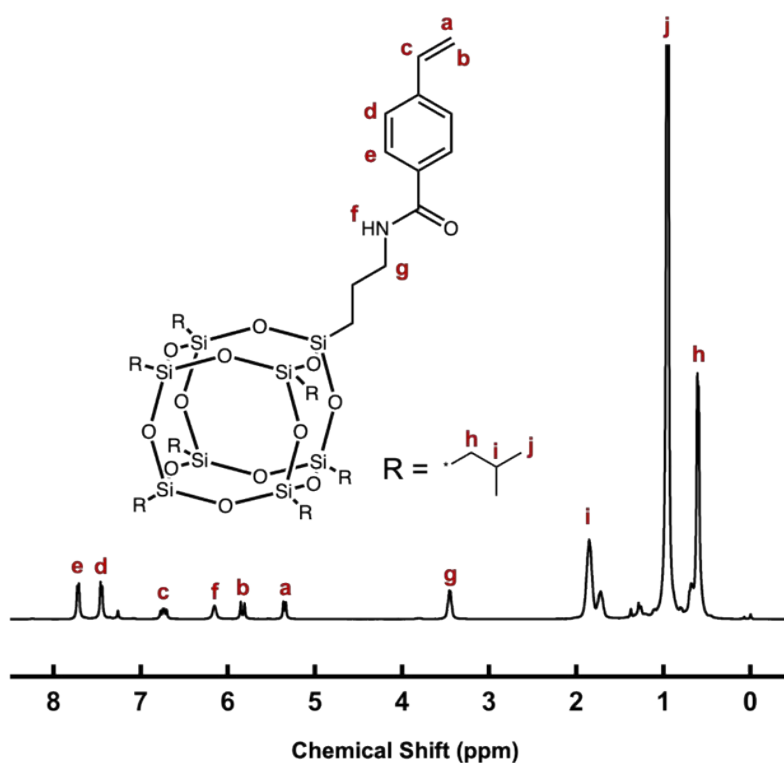

**Figure S2.**  $^1\text{H}$  NMR spectrum of StNPOSS monomer. (400 MHz,  $\text{CDCl}_3$ )

$^1\text{H}$  NMR (400 MHz,  $\text{CDCl}_3$ )  $\delta$  7.72 (d,  $J = 7.9$  Hz, Ar-H, 2H), 7.45 (d,  $J = 7.9$  Hz, Ar-H, 2H), 6.74 (dd,  $J = 17.6, 10.8$  Hz,  $-\text{CH}=\text{CH}_2$ , 1H), 6.15 (s,  $-\text{NH}-$ , 1H), 5.83 (d,  $J = 17.6$  Hz,  $-\text{CH}=\text{CH}_2$ , 1H), 5.35 (d,  $J = 10.8$  Hz,  $-\text{CH}=\text{CH}_2$ , 1H), 3.45 (q,  $J = 6.7$  Hz,  $-\text{CH}_2-\text{NH}-$ , 2H), 1.86 (dq,  $J = 13.8, 6.7$  Hz,  $-\text{CH}_2\text{CH}-$ , 7H), 1.72 (p,  $J = 7.2$  Hz,  $-\text{CH}_2-\text{CH}_2-\text{NH}-$ , 2H), 0.95 (d,  $J = 6.6$  Hz,  $-\text{CH}(\text{CH}_3)_2$ , 42H), 0.75 – 0.37 (m, Si- $\text{CH}_2-$ , 16H).

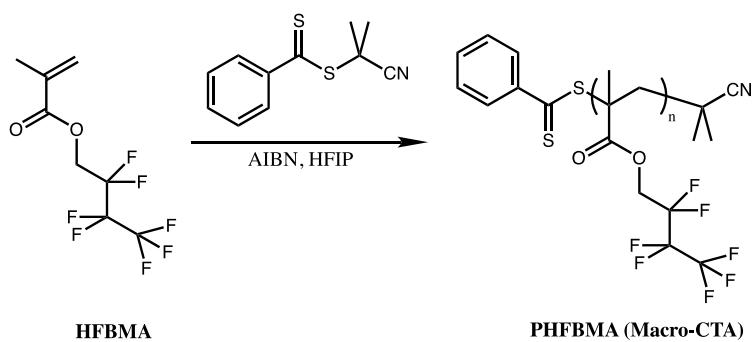

## 2. Synthesis and Characterization of Si- and F-containing BCPs.

**Scheme S3.** Synthetic route of PHFBMA homopolymer (macro-CTA).

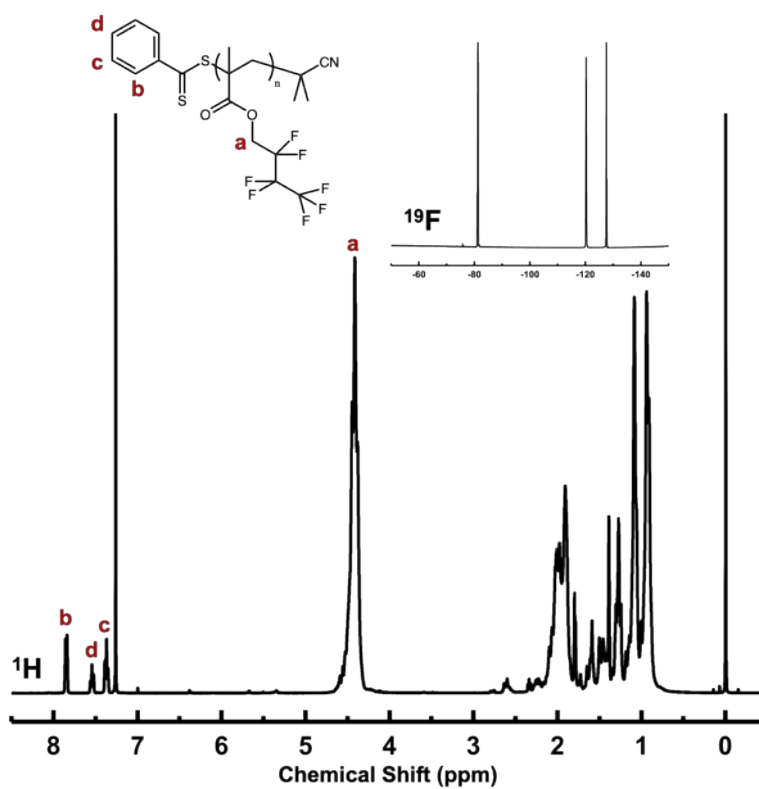

**Figure S3.**  $^1\text{H}$ ,  $^{19}\text{F}$  NMR spectra of PHFBMA homopolymer (macro RAFT CTA). (400 MHz,  $\text{CDCl}_3$ )

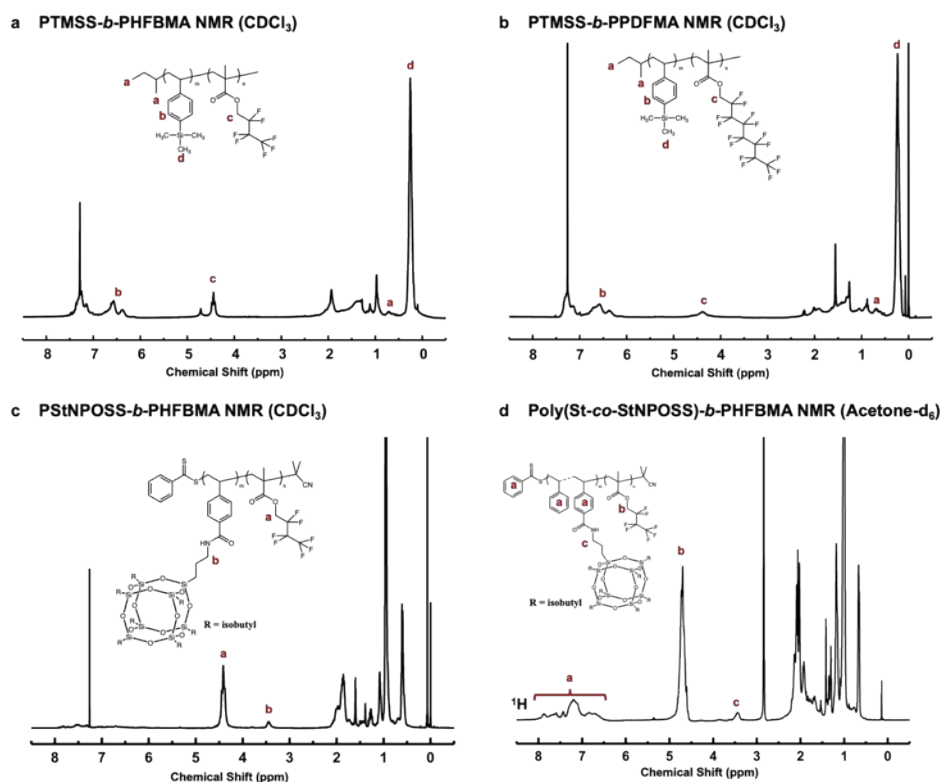

**Figure S4.** Full  $^1\text{H}$  NMR spectrum of a) PTMSS-*b*-PHFBMA (400 MHz,  $\text{CDCl}_3$ ), b) PTMSS-*b*-PPDFMA (400 MHz,  $\text{CDCl}_3$ ), c) PStNPOSS-*b*-PHFBMA (400 MHz,  $\text{CDCl}_3$ ) and d) Poly(St-*co*-StNPOSS)-*b*-PHFBMA (400 MHz, Acetone- $\text{d}_6$ ) block copolymer.

**Table S1.** Characterization of PStNPOSS-*b*-PHFBMA with shorter chain length.

| Sample                                                   | $M_n^{\text{a}}$<br>( $\text{kg}\cdot\text{mol}^{-1}$ ) | $\text{PDI}^{\text{a}}$ | $\text{DP}_{\text{StNPOSS}}^{\text{b}}$ | $\text{DP}_{\text{PHFBMA}}^{\text{b}}$ | $N$ | Morphology <sup>d)</sup> |
|----------------------------------------------------------|---------------------------------------------------------|-------------------------|-----------------------------------------|----------------------------------------|-----|--------------------------|
| PStNPOSS <sub>1.5</sub> - <i>b</i> -PHBMFA <sub>30</sub> | 8.4                                                     | 1.07                    | 1.5                                     | 30                                     | 88  | DIS                      |
| PStNPOSS <sub>3.2</sub> - <i>b</i> -PHBMFA <sub>30</sub> | 8.7                                                     | 1.09                    | 3.2                                     | 30                                     | 104 | DIS                      |
| PStNPOSS <sub>6.3</sub> - <i>b</i> -PHBMFA <sub>30</sub> | 10.0                                                    | 1.07                    | 6.3                                     | 30                                     | 135 | DIS                      |
| PStNPOSS <sub>4.5</sub> - <i>b</i> -PHBMFA <sub>25</sub> | 8.8                                                     | 1.08                    | 4.5                                     | 25                                     | 105 | DIS                      |

a) The number-average molecular weights ( $M_n$ ) and polydispersity indexes (PDI) were obtained by GPC in THF against PS standards. b) The degrees of polymerization of PStNPOSS-*b*-PHFBMA were calculated by  $^1\text{H}$ -NMR. c) Calculation of the total degree of polymerization ( $N$ ) was performed based on a  $118 \text{ \AA}^3$  reference volume ( $v_0$ ) using the densities of PHFBMA ( $1.55 \text{ g}\cdot\text{cm}^{-3}$ ) and PStNPOSS ( $1.44 \text{ g}\cdot\text{cm}^{-3}$ ). d) Morphology was characterized by SAXS.

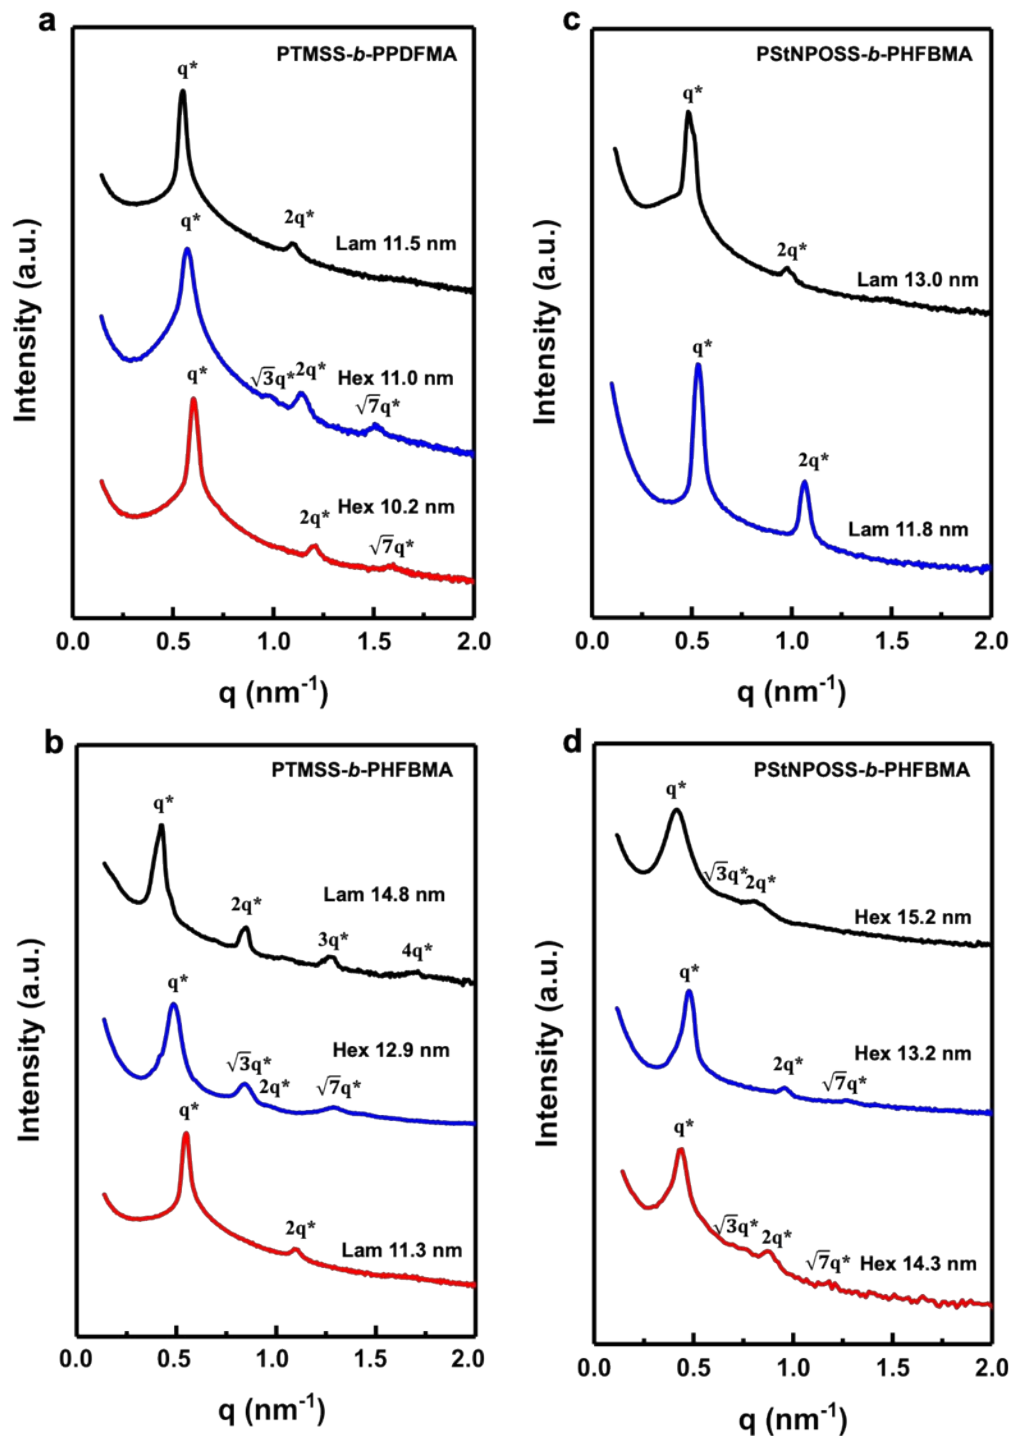

**Figure S5.** a) and b) were SAXS profiles of PTMSS-*b*-PPDFMA and PTMSS-*b*-PHFBMA block copolymers after annealing completion (10 h at 160 °C), respectively. c) and d) were SAXS profiles of PStNPOSS-*b*-PHFBMA block copolymers after annealing completion (1 h at 160 °C). The morphologies and  $d$ -spacings were presented above the end of each SAXS profile.  $D$ -spacings equaled to  $2\pi/q^*$ , where  $q^*$  was position of the first-order peak in SAXS.

### 3. Determination of $\chi$ by temperature-dependent SAXS

Equations used to fit the disordered state scattering of a block copolymer are shown below.<sup>1,2</sup>

$$I(q) = A/(S(q)/W(q) - 2\chi)$$

$$S(q) = \langle S_{Si, Si}(q) \rangle + 2\langle S_{Si, F}(q) \rangle + \langle S_{F, F}(q) \rangle$$

$$W(q) = \langle S_{Si, Si}(q) \rangle \cdot \langle S_{F, F}(q) \rangle - \langle S_{Si, F}(q) \rangle^2$$

$$\langle S_{X, X}(q) \rangle = r_c f_X^2 g^{(2)}_X(q)$$

$$\langle S_{Si, F}(q) \rangle = r_c f_{Si} f_F g^{(1)}_{Si}(q) g^{(1)}_F(q)$$

$$r_c = (v_{Si} N_{Si} + v_F N_F) / (v_{Si} \cdot v_F)^{1/2}$$

$$g^{(1)}_X(q) = \{1 - [y_X(q) \cdot (\mathcal{D}_X - 1) + 1]^{-1/(\mathcal{D}_X - 1)}\} / y_X(q)$$

$$g^{(2)}_X(q) = 2\{-1 + y_X(q) + [y_X(q) \cdot (\mathcal{D}_X - 1) + 1]^{-1/(\mathcal{D}_X - 1)}\} / y_X(q)^2$$

$$y_X(q) = N_X a_X^2 / 6 \cdot q^2$$

$$\mathcal{D}_X = M_{w, X} / M_{n, X}$$

Where  $Si$  = Si-containing block (PTMSS or PStNPOSS),  $F$  = fluorinated block ( $F$ , PHFBMA or PPDFMA), and  $X$  = Si-containing block or fluorinated block according to specific BCP system,  $\mathcal{D}_X$  is the dispersity index determined by GPC,  $a$  is the statistical segment length,  $N$  is volume-based degree of polymerization normalized by using  $118 \text{ \AA}^3$  as a reference volume,  $f$  is the volume fraction of two segments, and  $v$  is the molar volume calculated by bulk density of each segment.

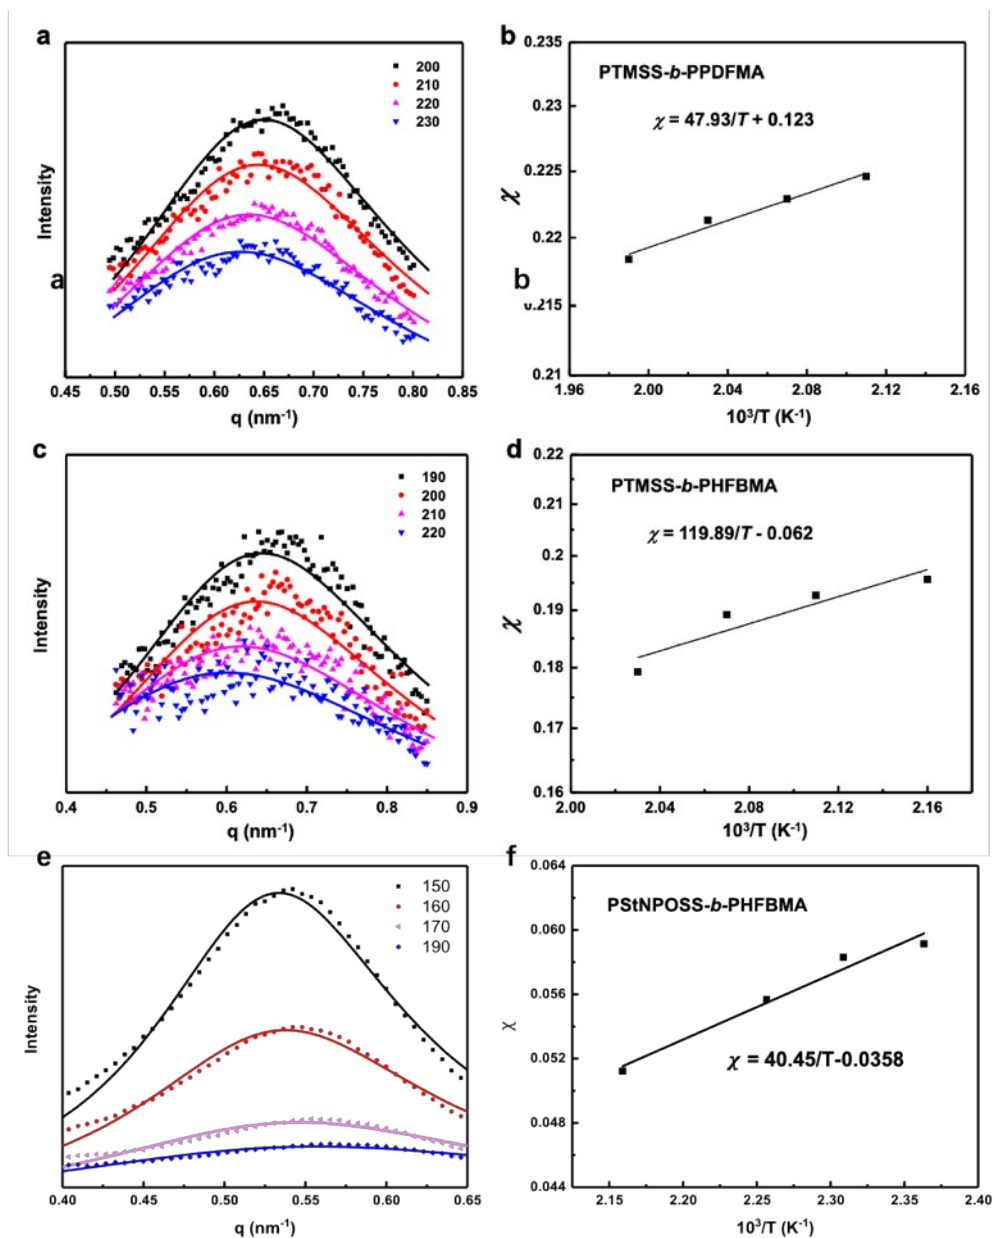

**Figure S6.** (a) SAXS data and fitlines for disordered PTMSS-*b*-PPDFMA at various temperatures. The best fit was obtained by changing  $\chi$  as one of the adjustable parameters using Leibler's mean-field theory. (b) Temperature dependence of  $\chi$  between PTMSS and PPDFMA and the corresponding best fitline. (c) to (f) are corresponding results of PTMSS-*b*-PHFBMA and PStNPOSS-*b*-PHFBMA.

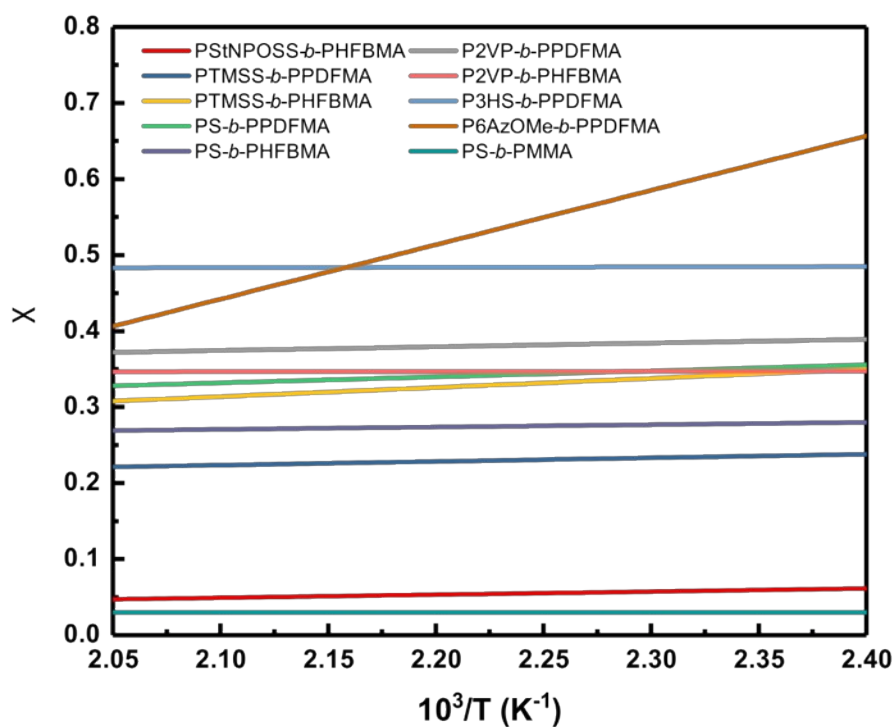

**Figure S7.** Temperature dependence fitline of  $\chi$  value of fluorinated BCPs and conventional PS-*b*-PMMA.

**Table S2.**  $\chi$  value of fluorinated BCPs and conventional PS-*b*-PMMA.

| BCP                                     | Relation between T and $\chi$ | $\chi_{\text{eff}}$ (@150 °C) |
|-----------------------------------------|-------------------------------|-------------------------------|
| PS <sub>t</sub> NPOSS- <i>b</i> -PHFBMA | $\chi = 40.45/T - 0.0358$     | 0.060                         |
| PTMSS- <i>b</i> -PPDFMA                 | $\chi = 47.93/T + 0.123$      | 0.236                         |
| PTMSS- <i>b</i> -PHFBMA                 | $\chi = 119.89/T - 0.062$     | 0.221                         |
| PS- <i>b</i> -PPDFMA <sup>3</sup>       | $\chi = 78.51/T + 0.167$      | 0.353                         |
| PS- <i>b</i> -PHFBMA <sup>3</sup>       | $\chi = 30.80/T + 0.206$      | 0.279                         |
| P2VP- <i>b</i> -PPDFMA <sup>4</sup>     | $\chi = 48.79/T + 0.272$      | 0.387                         |
| P2VP- <i>b</i> -PHFBMA <sup>4</sup>     | $\chi = 2.29/T + 0.342$       | 0.347                         |
| P3HS- <i>b</i> -PPDFMA <sup>5</sup>     | $\chi = 4.4/T + 0.4742$       | 0.485                         |
| P6AzOMe- <i>b</i> -PPDFMA <sup>6</sup>  | $\chi = 715.7/T - 1.061$      | 0.630                         |
| PS- <i>b</i> -PMMA                      | /                             | 0.030                         |



#### 4. Self-assembly performance of BCPs with one POSS or TMSS block

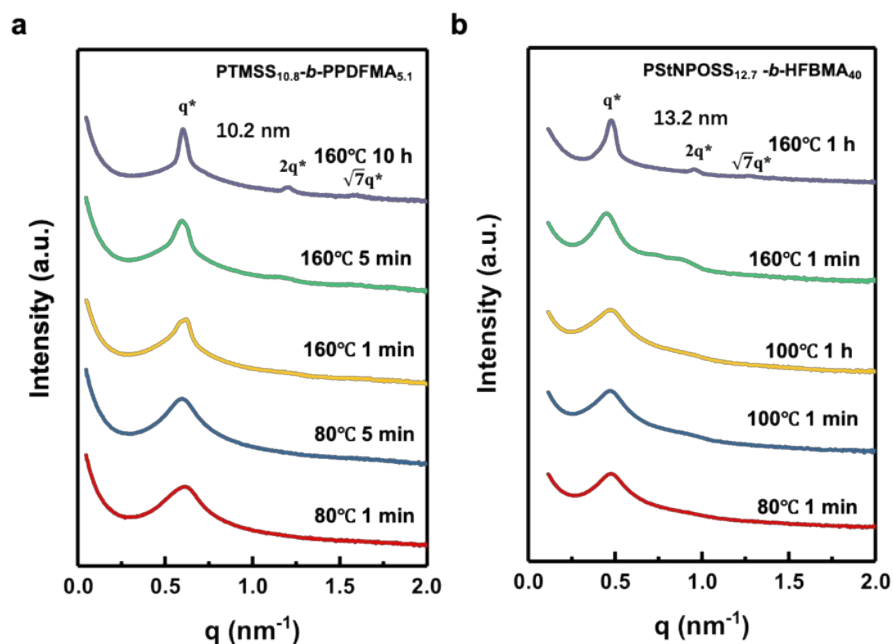

**Figure S8.** (a) SAXS profiles of PTMSS<sub>10.8</sub>-*b*-PPDFMA<sub>5.1</sub> after thermal annealing at 80 °C (1 min and 5 min), 160 °C (1 min, 5 min and 10 h). (b) SAXS profiles of PStNPOSS<sub>12.7</sub>-*b*-PHFBMA<sub>40</sub> after thermal annealing at 80 °C (1 min), 100 °C (1 min and 1 h) and 160 °C (1 min, 1 h).

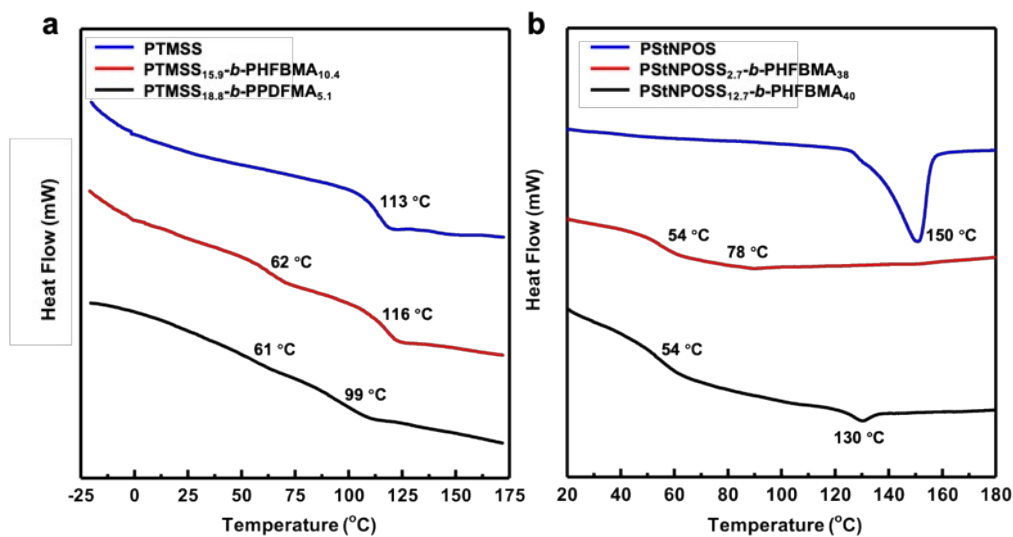

**Figure S9.** (a) DSC curves of PTMSS<sub>18.8</sub>-*b*-PPDFMA<sub>5.1</sub> ( $T_g$ , 61 °C and 99 °C) and PTMSS<sub>15.9</sub>-*b*-PHFBMA<sub>10.4</sub> ( $T_g$ , 62 °C and 116 °C) compared to PTMSS ( $T_g$ , 113 °C) homopolymer. (b) DSC curves of PStNPOSS<sub>2.7</sub>-*b*-PHFBMA<sub>38</sub> ( $T_g$ , 54 °C and 78 °C) and PStNPOSS<sub>12.7</sub>-*b*-PHFBMA<sub>40</sub> ( $T_g$ , 54 °C;  $T_m$ , 130 °C) compared to PStNPOSS ( $T_m$ , 150 °C) homopolymer.

## 5. Characterization of Poly(St-*co*-StNPOSS)-*b*-PHFBMA BCP

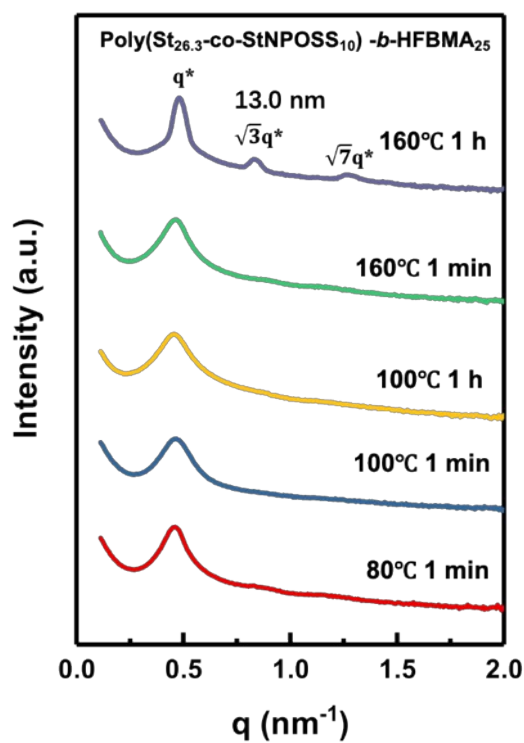

**Figure S10.** SAXS profiles of Poly(St<sub>26.3</sub>-*co*-StNPOSS<sub>10</sub>)-*b*-PHFBMA<sub>25</sub> after thermal annealing at 80 °C (1 min), 100 °C (1 min and 1 h) and 160 °C (1 min, 1 h).

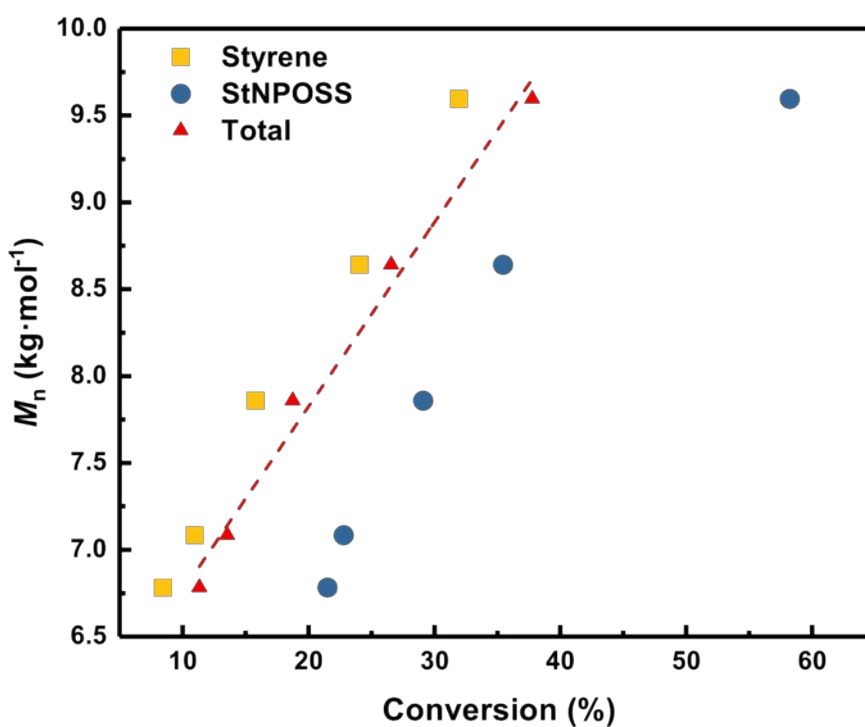

**Figure S11.** Styrene, StNPOSS and total monomer conversion against molecular weight in

second step RAFT polymerization of Poly(*St-co-St*NPOSS)-*b*-PHFBMA.

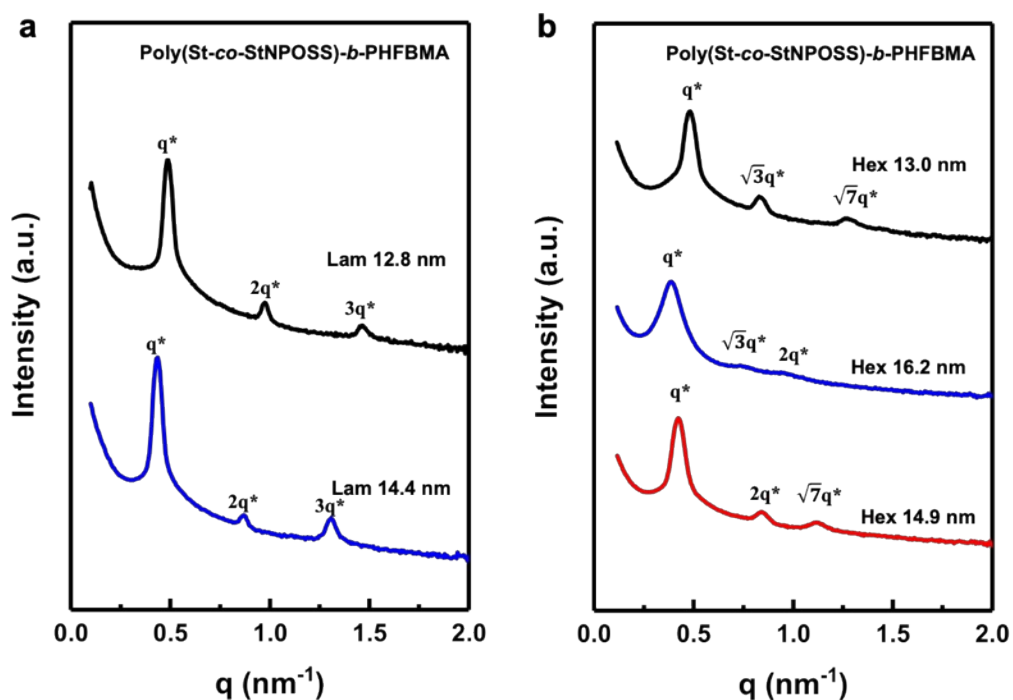

**Figure S12.** SAXS profiles of Poly(*St-co-St*NPOSS)-*b*-PHFBMA block copolymers after annealing completion (1 h at 160 °C). The morphologies and  $d$ -spacings were presented above the end of each SAXS profile.  $d$ -spacings equaled to  $2\pi/q^*$ , where  $q^*$  was position of the first-order peak in SAXS.

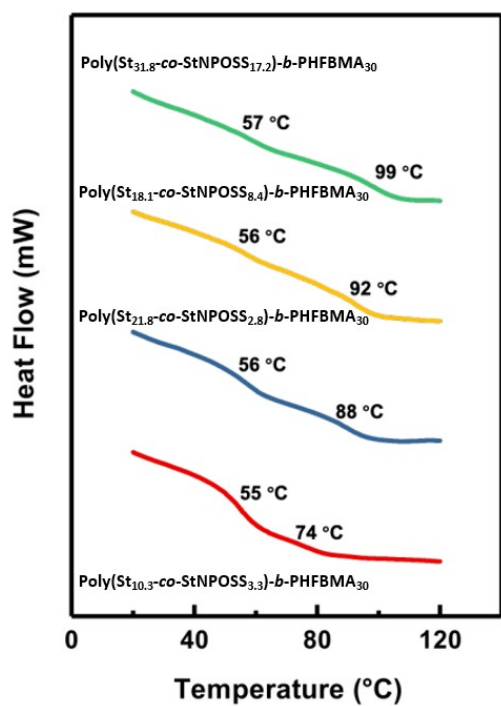

Figure S13. DSC curves of Poly (St-co-StNPOSS)-*b*-PHFBMA BCP samples.

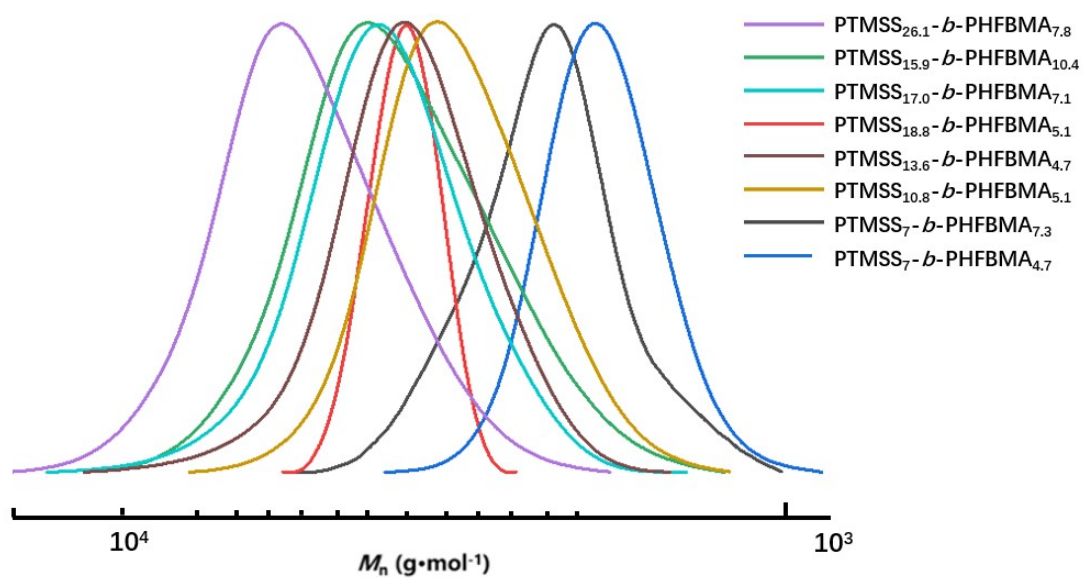

Figure S14. GPC traces of synthesized PTMSS-*b*-PHFBMA.

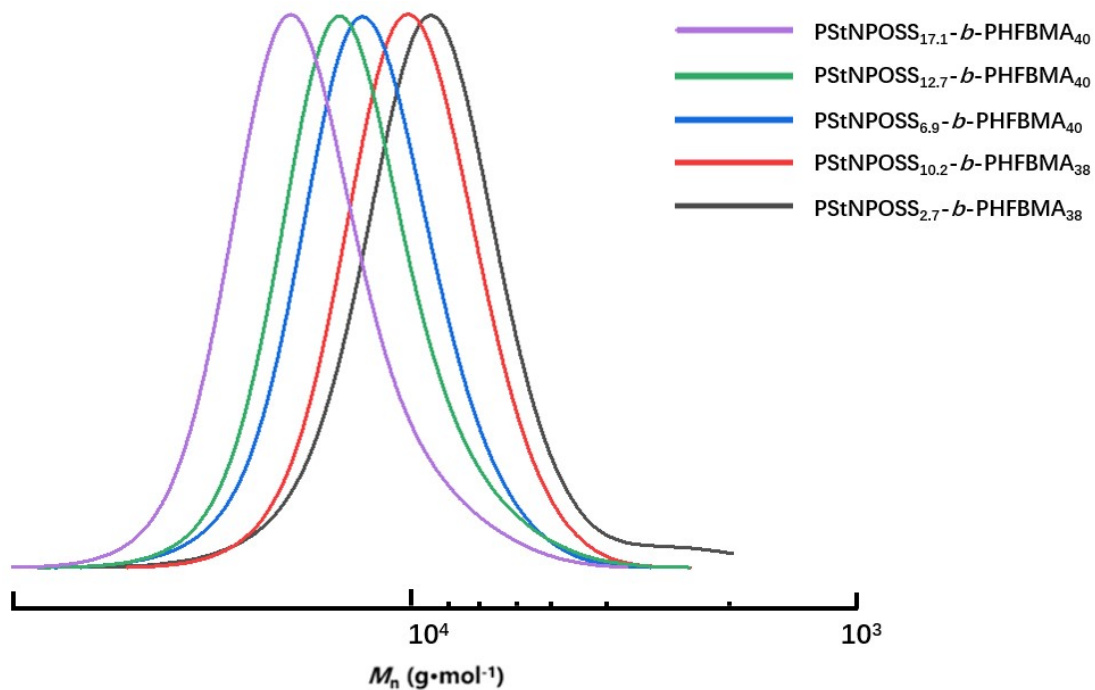

Figure S15. GPC traces of synthesized PStNPOSS-*b*-PHFBMA.

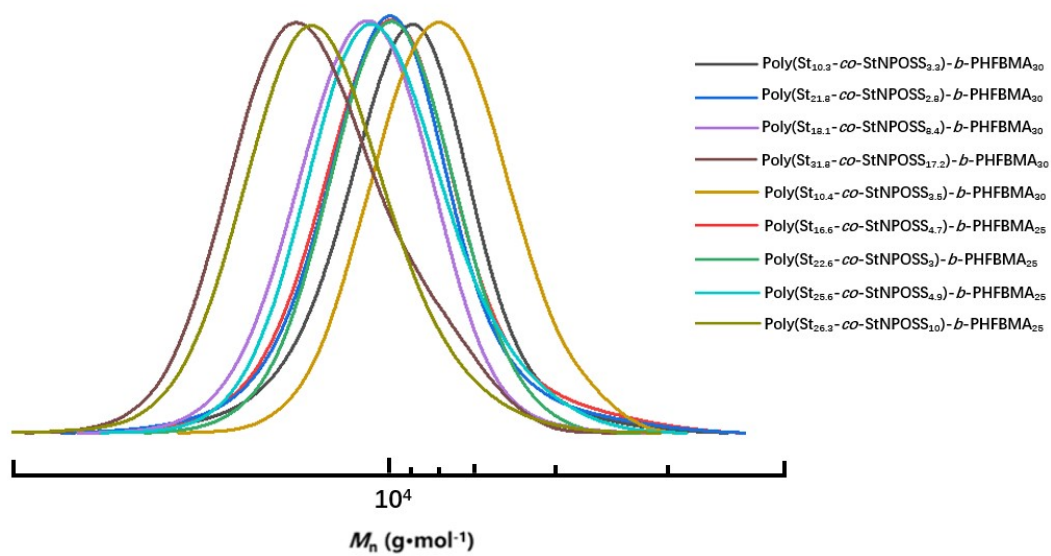

Figure S16. GPC traces of synthesized Poly (St-*co*-StNPOSS)-*b*-PHFBMA.

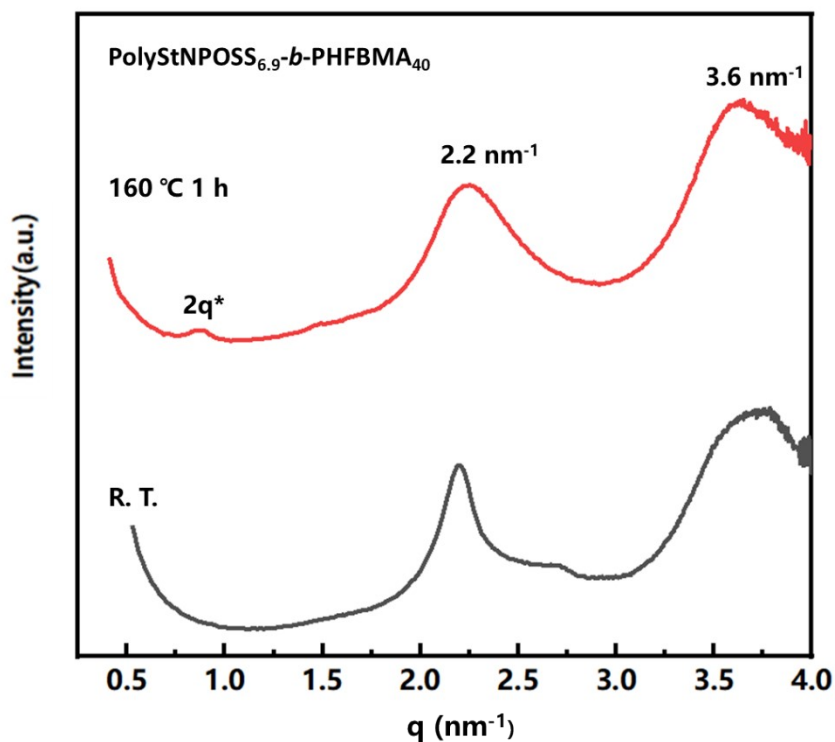

**Figure S17.** WAXS profiles of PolyStNPOSS<sub>6.9</sub>-*b*-PHFBMA<sub>40</sub> under room temperature (black) and after 1 hour at 160 °C, peaks positioned at 2.2 nm<sup>-1</sup> and 3.6 nm<sup>-1</sup> exists in both profiles.

## 5. Etch resistance characterization

**Table S3.** Polymers used for etch resistance characterization

| Polymer                                    | Si wt% | $M_n^{b)}$ | Change of Film Thickness <sup>c)</sup> (nm, 60 s) |
|--------------------------------------------|--------|------------|---------------------------------------------------|
| PMMA                                       | /      | 18.1       | 59.5                                              |
| PS                                         | /      | 3.8        | 34.8                                              |
| PHFBMA                                     | /      | 5.1        | 44.1                                              |
| PTMSS                                      | 15.9%  | 3.5        | 18.1                                              |
| Poly(St- <i>co</i> -StNPOSS) <sup>a)</sup> | 18.5%  | 5.7        | 12.9                                              |
| PStNPOSS                                   | 22.3%  | 9.6        | 6.2                                               |

a) The molar ratio between PS and PStNPOSS, calculated by <sup>1</sup>H NMR, was 2:1. b) Molecular weight was measured by GPC in THF against PS standards. c) Change of film thickness after etching for 60 s.

## References

- (1). Leibler, L., Theory of Microphase Separation in Block Copolymers. *Macromolecules* **1980**, 13, (6), 1602-1617.
- (2). Sakamoto, N.; Hashimoto, T., Order-Disorder Transition of Low Molecular Weight Polystyrene-*block*-Polyisoprene. 1. SAXS Analysis of Two Characteristic Temperatures. *Macromolecules* **1995**, 28, (20), 6825-6834.
- (3). Li, X.; Li, J.; Wang, C.; Liu, Y.; Deng, H., Fast Self-Assembly of Polystyrene-*b*-poly(fluoro methacrylate) into Sub-5 nm Microdomains for Nanopatterning Applications. *Journal of Materials Chemistry C* **2019**, 7, (9), 2535-2540.
- (4). Li, X.; Deng, H., Poly(2-vinylpyridine)-*b*-poly(fluorinated methacrylate) Block Copolymers Forming 5 nm Domains Containing Metallocene. *ACS Applied Polymer Materials* **2020**, 2, (8), 3601-3611.
- (5). Wang, C.; Li, X.; Deng, H., Synthesis of a Fluoromethacrylate Hydroxystyrene Block Copolymer Capable of Rapidly Forming Sub-5 nm Domains at Low Temperatures. *ACS Macro Letters* **2019**, 8, (4), 368-373.
- (6). Cao, H.; Dai, L.; Liu, Y.; Li, X.; Yang, Z.; Deng, H., Methacrylic Block Copolymers Containing Liquid Crystalline and Fluorinated Side Chains Capable of Fast Formation of 4 nm Domains. *Macromolecules* **2020**, 53, (20), 8757-8764.
